# Supplementary material for: Progressive multiple sclerosis patients show substantial lesion activity that correlates with clinical disease severity and sex: a retrospective autopsy cohort analysis
Source: Springer Nature journal article supplement (doi:10.1007/s00401-018-1818-y), 2018-02-13
Supplement: 401_2018_1818_MOESM1_ESM.pdf [file 401_2018_1818_MOESM1_ESM.pdf]

## Online resource 1:

### Supplemental Table 1 Characteristics of tissue blocks examined

Mean number of blocks per case for clinical subtypes and sex and the number of cases that have specific block types available. BRS: diagnostic blocks dissected at 7 standardized locations from the brainstem. SPC: diagnostic blocks dissected at 6 standardized locations from the spinal cord. PLA: macroscopically visible MS lesions dissected. MRI: MS lesions dissected on post-mortem MRI guidance. PLA/MRI with cortex: tissue blocks with cortex present.

| MS type/sex         | No. blocks per case<br>(mean $\pm$ SD) | Total no.<br>blocks       |
|---------------------|----------------------------------------|---------------------------|
| all                 | 18 $\pm$ 0.8                           | 3188                      |
| PP                  | 18 $\pm$ 1.3                           |                           |
| SP                  | 18 $\pm$ 1.1                           |                           |
| Relapsing           | 19 $\pm$ 2.6                           |                           |
| Females             | 17 $\pm$ 1.0                           |                           |
| Males               | 19 $\pm$ 1.3                           |                           |
| Block type          | No. cases per block type               | % cases per<br>block type |
| BRS                 | 161                                    | 88,5                      |
| SPC                 | 120                                    | 65,9                      |
| PLA/MRI             | 162                                    | 89,0                      |
| PLA                 | 150                                    | 82,4                      |
| MRI                 | 116                                    | 63,7                      |
| PLA/MRI with cortex | 160                                    | 88,9                      |

Article title: Progressive Multiple Sclerosis patients show substantial lesion activity that correlates with clinical disease severity and sex: a retrospective autopsy cohort analysis

Journal name: Acta Neuropathologica

Author names: Sabina Luchetti# MD PhD, Nina L. Fransen# MD MSc, Corbert G. van Eden PhD, Valeria

Ramaglia PhD, Matthew Mason\* PhD, Inge Huitinga\* PhD

Corresponding author: Inge Huitinga, PhD, Leader Neuroimmunology group Netherlands Institute for

Neuroscience, e-mail [i.huitinga@nin.knaw.nl](mailto:i.huitinga@nin.knaw.nl),
