# Supplementary material for: Progressive multiple sclerosis patients show substantial lesion activity that correlates with clinical disease severity and sex: a retrospective autopsy cohort analysis
Source: Springer Nature journal article supplement (doi:10.1007/s00401-018-1818-y), 2018-02-13
Supplement: 401_2018_1818_MOESM5_ESM.pdf [file 401_2018_1818_MOESM5_ESM.pdf]

**Online resource 5:**

**Supplemental Figure 4 Relationship between cortical grey matter lesions, sex and time to EDSS-6 in years**

a. An inverse relationship was found between grey matter lesion presence and severity in females (GLM,  $p=0.004$ ) but not in males ( $p = 0.56$ ). Patients are grouped based on years to EDSS-6 and number of patients per group is shown in the bar. b. Females with cortical grey matter lesions have higher disease severity ( $p=0.004$ , students t-test), whereas in males no significant difference was found ( $p=0.730$ , students t-test).

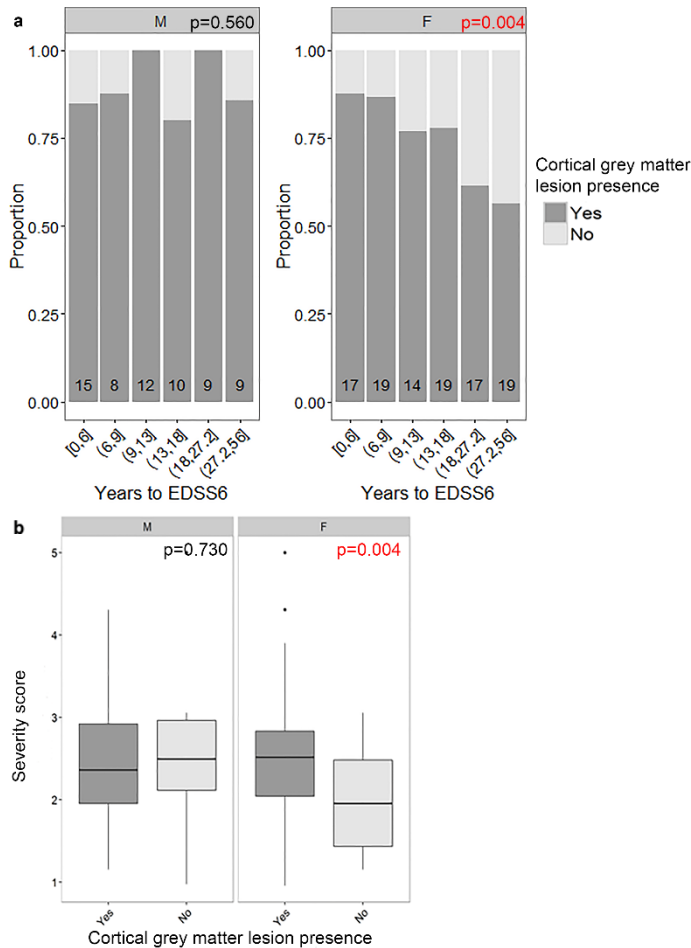

Article title: Progressive Multiple Sclerosis patients show substantial lesion activity that correlates with clinical disease severity and sex: a retrospective autopsy cohort analysis

Journal name: Acta Neuropathologica

Author names: Sabina Luchetti# MD PhD, Nina L. Fransen# MD MSc, Corbert G. van Eden PhD, Valeria

Ramaglia PhD, Matthew Mason\* PhD, Inge Huitinga\* PhD

Corresponding author: Inge Huitinga, PhD, Leader Neuroimmunology group Netherlands Institute for Neuroscience, e-mail [i.huitinga@nin.knaw.nl](mailto:i.huitinga@nin.knaw.nl)
