# Supplementary material for: Progressive multiple sclerosis patients show substantial lesion activity that correlates with clinical disease severity and sex: a retrospective autopsy cohort analysis
Source: Springer Nature journal article supplement (doi:10.1007/s00401-018-1818-y), 2018-02-13
Supplement: MOESM6 [file 15462028]

## Online resource 6:

### Supplemental Figure 5 Relationship between cortical grey matter lesion subtypes and lesion activity

The presence of leukocortical (type I) and intracortical (type II) lesions is strongly related to lesion load, reactive load, proportions of mixed active/inactive lesions and remyelinated lesions, while subpial III and IV lesions show only a relation with lesion load. Student t-test with unequal variances is used.

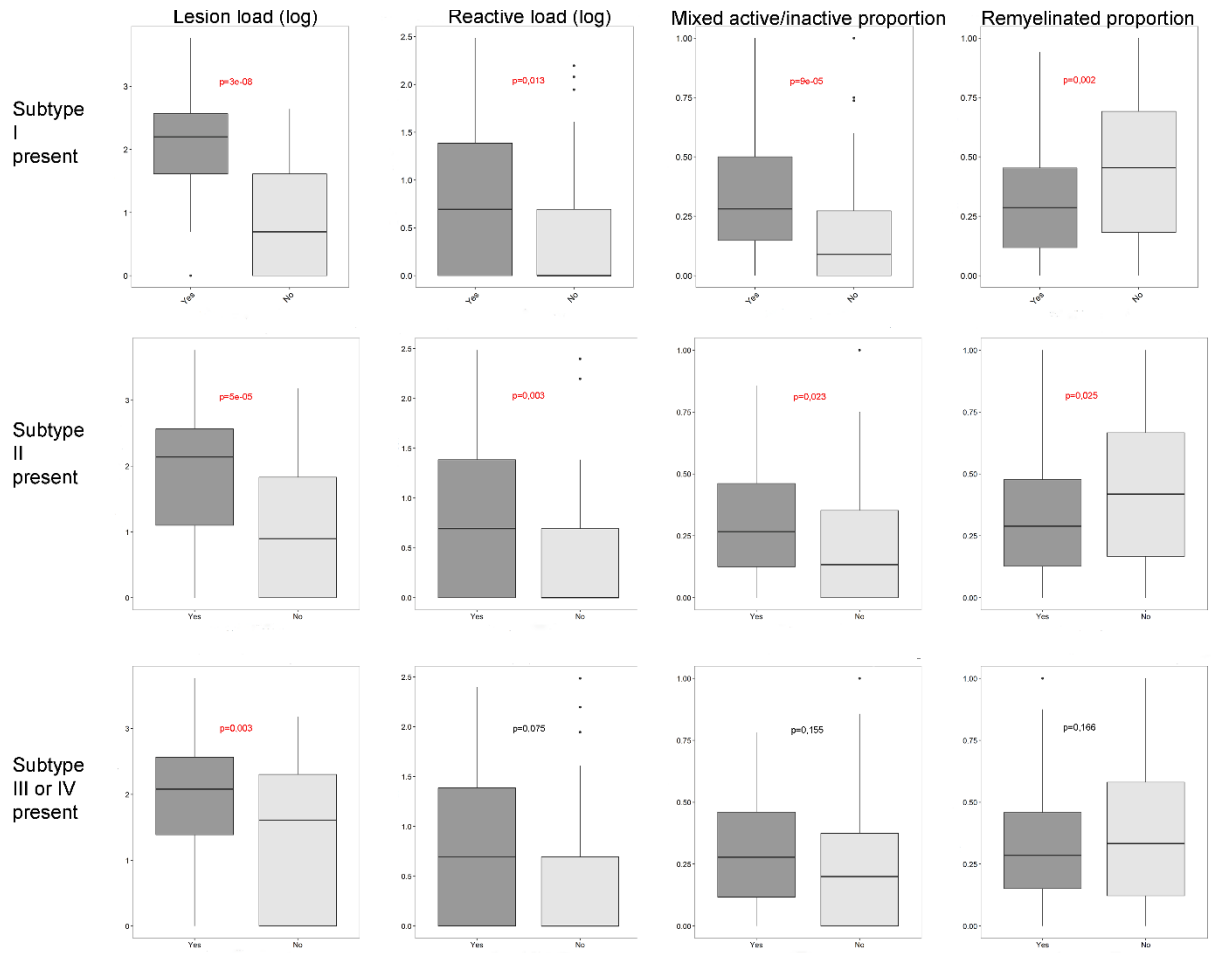

Article title: Progressive Multiple Sclerosis patients show substantial lesion activity that correlates with clinical disease severity and sex: a retrospective autopsy cohort analysis

Journal name: Acta Neuropathologica

Author names: Sabina Luchetti# MD PhD, Nina L. Fransen# MD MSc, Corbert G. van Eden PhD, Valeria

Ramaglia PhD, Matthew Mason\* PhD, Inge Huitinga\* PhD

Corresponding author: Inge Huitinga, PhD, Leader Neuroimmunology group Netherlands Institute for Neuroscience, e-mail [i.huitinga@nin.knaw.nl](mailto:i.huitinga@nin.knaw.nl)
